# Supplementary material for: Analysis of human menisci degeneration via infrared attenuated total reflection spectroscopy
Source: Royal Society of Chemistry journal article supplement (doi:10.1039/c8an00924d), 2018-01-01
Supplement: c8an00924d1.pdf [file c8an00924d1.pdf]

## Electronic Supplementary Information

### Analysis of human menisci degeneration via infrared attenuated total reflection spectroscopy

Pei Wang<sup>a</sup>, Jonas Balko<sup>b</sup>, Rui Lu<sup>c</sup>, Ángela I. López-Lorente<sup>d</sup>, Lutz Dürselen<sup>b</sup>, Boris Mizaikoff<sup>a,\*</sup>

<sup>a</sup>*Institute of Analytical and Bioanalytical Chemistry, Ulm University, 89081 Ulm, Germany.*

<sup>b</sup>*Institute of Orthopaedic Research and Biomechanics, Trauma Research Center, Ulm University-Medical Center, 89081 Ulm, Germany*

<sup>c</sup>*Jiangsu Key Laboratory of Chemical Pollution Control and Resources Reuse, School of Environmental and Biological Engineering, Nanjing University of Science and Technology, 210094 Nanjing, China*

<sup>d</sup>*Departamento de Química Analítica, Instituto Universitario de Investigación en Química Fina y Nanoquímica IUIQFN, Universidad de Córdoba, Campus de Rabanales, E-14071 Córdoba, España.*

*\*Corresponding author: boris.mizaikoff@uni-ulm.de*

#### Histological staining classification of the samples

**A**

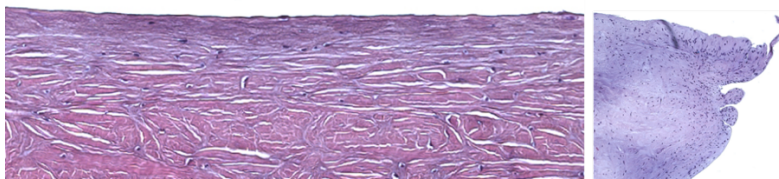

**B**

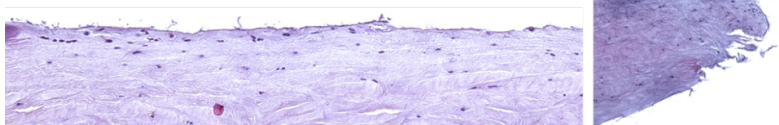

**C**

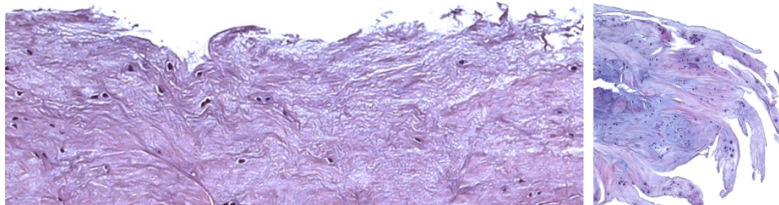

**D**

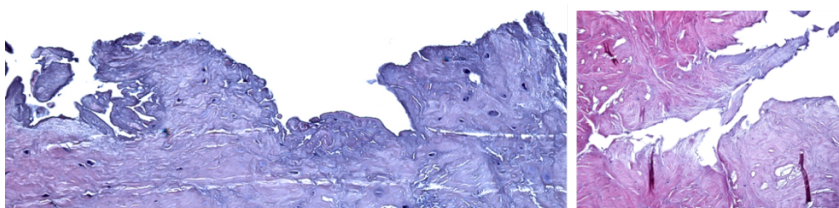

**Figure S1.** Histological assessment. Increasing degeneration from A to D. Left: femoral/tibial, Right: Inner border. (A) Smooth articular surface/inner border. (B) Slightly fibrillated

surface/inner border. (C) Obvious moderate undulated surface/inner border. (D) Disruption of the surface/inner border. H&E 10x.

### IR-ATR spectra of human menisci sample

Attenuated total reflection infrared spectroscopy spectra were recorded via a Bruker Alpha FT-IR spectrometer equipped with a single-reflection ATR module (Platinum ATR). Spectra were acquired in the spectral range 4000-800  $\text{cm}^{-1}$  with a spectral resolution of 2  $\text{cm}^{-1}$  as an average of 500 spectral scans. Figure S2 depicts an example of a raw IR-ATR spectra obtained for a meniscus sample with grade 3 degeneration. For further analysis, spectra were subjected to smoothing and baseline correction prior second derivative Gaussian peak-fit model.

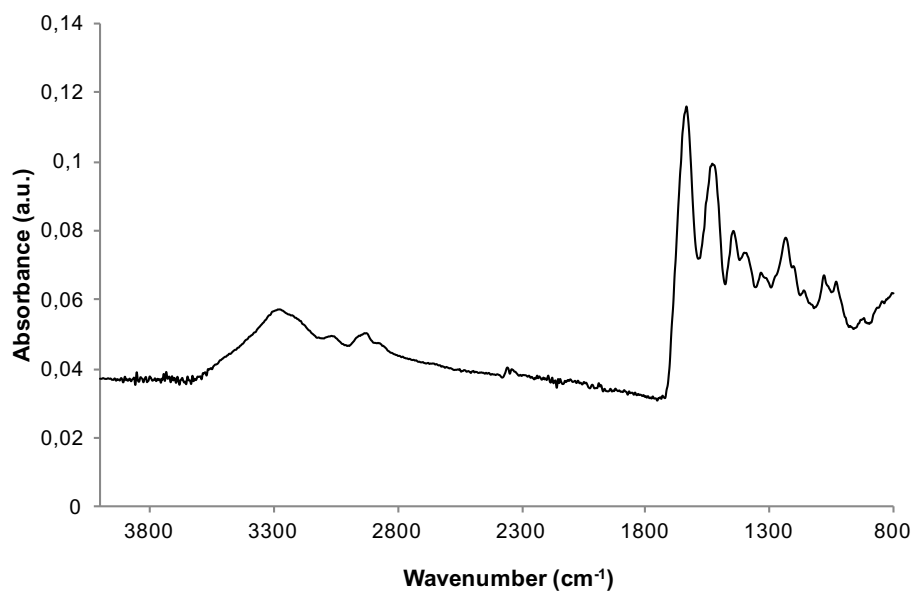

**Figure S2.** IR-ATR spectrum in the region 4000-800  $\text{cm}^{-1}$  of a meniscus samples with grade 3 degeneration.
